# Supplementary material
Source: PubMed Central journal article supplement (PMC3947310)
Supplement: NIHMS536076-supplement-1.pdf [file NIHMS536076-supplement-1.pdf]

# Sterilization of granulomas is common in both active and latent tuberculosis despite extensive within-host variability in bacterial killing

Philana Ling Lin\*, Christopher B. Ford\*, M. Teresa Coleman, Amy J. Myers, Richa Gawande, Thomas Joerger, James Sacchettini, Sarah M. Fortune<sup>§</sup>, JoAnne L. Flynn<sup>§</sup>

\*Authors contributed equally; <sup>§</sup>Corresponding author

## Supplemental Figure 1

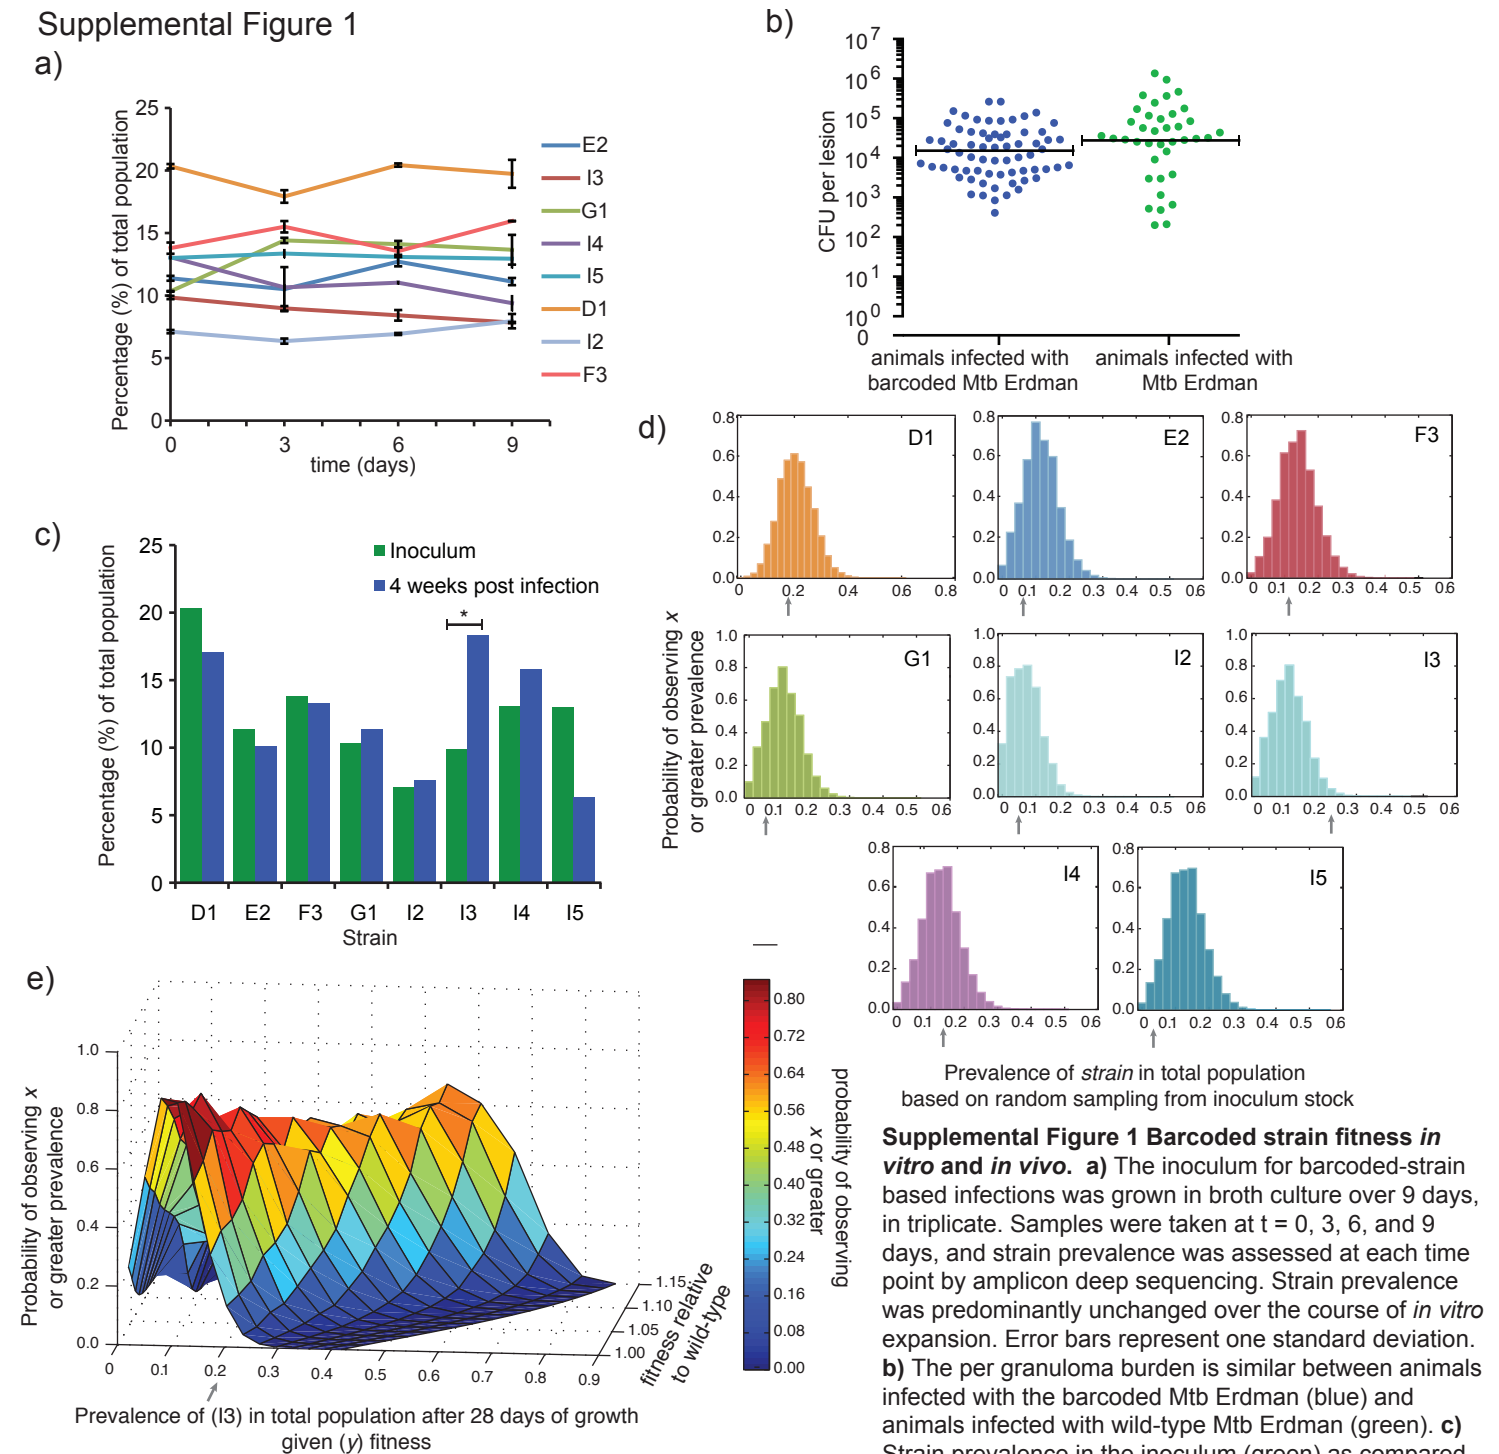

### Supplemental Figure 1 Barcoded strain fitness *in vitro* and *in vivo*.

**a)** The inoculum for barcoded-strain based infections was grown in broth culture over 9 days, in triplicate. Samples were taken at  $t = 0, 3, 6$ , and 9 days, and strain prevalence was assessed at each time point by amplicon deep sequencing. Strain prevalence was predominantly unchanged over the course of *in vitro* expansion. Error bars represent one standard deviation. **b)** The per granuloma burden is similar between animals infected with the barcoded Mtb Erdman (blue) and animals infected with wild-type Mtb Erdman (green). **c)** Strain prevalence in the inoculum (green) as compared

to the average prevalence of each strain across all samples after 4 weeks of *in vivo* growth (blue). The majority of strains are not significantly changed from inoculum to 28 days post infection. Strain I3 saw a significant increase ( $\sim 8\%$ ,  $p = 0.023$ ). **d)** To determine if differences after 28 days of *in vivo* growth were due to stochastic sampling of the inoculum, sampling was simulated based on the prevalence of each strain in the inoculum stock ( $S_i$ ). Using a binomial distribution with 34 trials, and the probability of success equal to  $S_i$ , 1e6 random numbers were generated for each strain,  $i$ , to build the expected sampling distribution. For strain I3, the probability of the observed prevalence after infection was less than 0.05, suggesting this prevalence may have been due to changes in strain fitness. Arrows represent observed prevalence. **e)** To estimate the potential change in fitness, bacterial growth *in vivo* was simulated for strain I3 according to equation (1), with fitness ranging from 1.00 (no change) to 1.15 (a 15% increase). With a 1% increase in fitness, the prevalence of change in I3 is no longer significant, and with a 5% increase, the probability of the observed prevalence is maximized. Together, these data and simulations suggest that strain I3 may have a slight increase in fitness, though, as stated in text, this does not change our final conclusions. The grey arrow represents the observed prevalence.

## Supplemental Figure 2

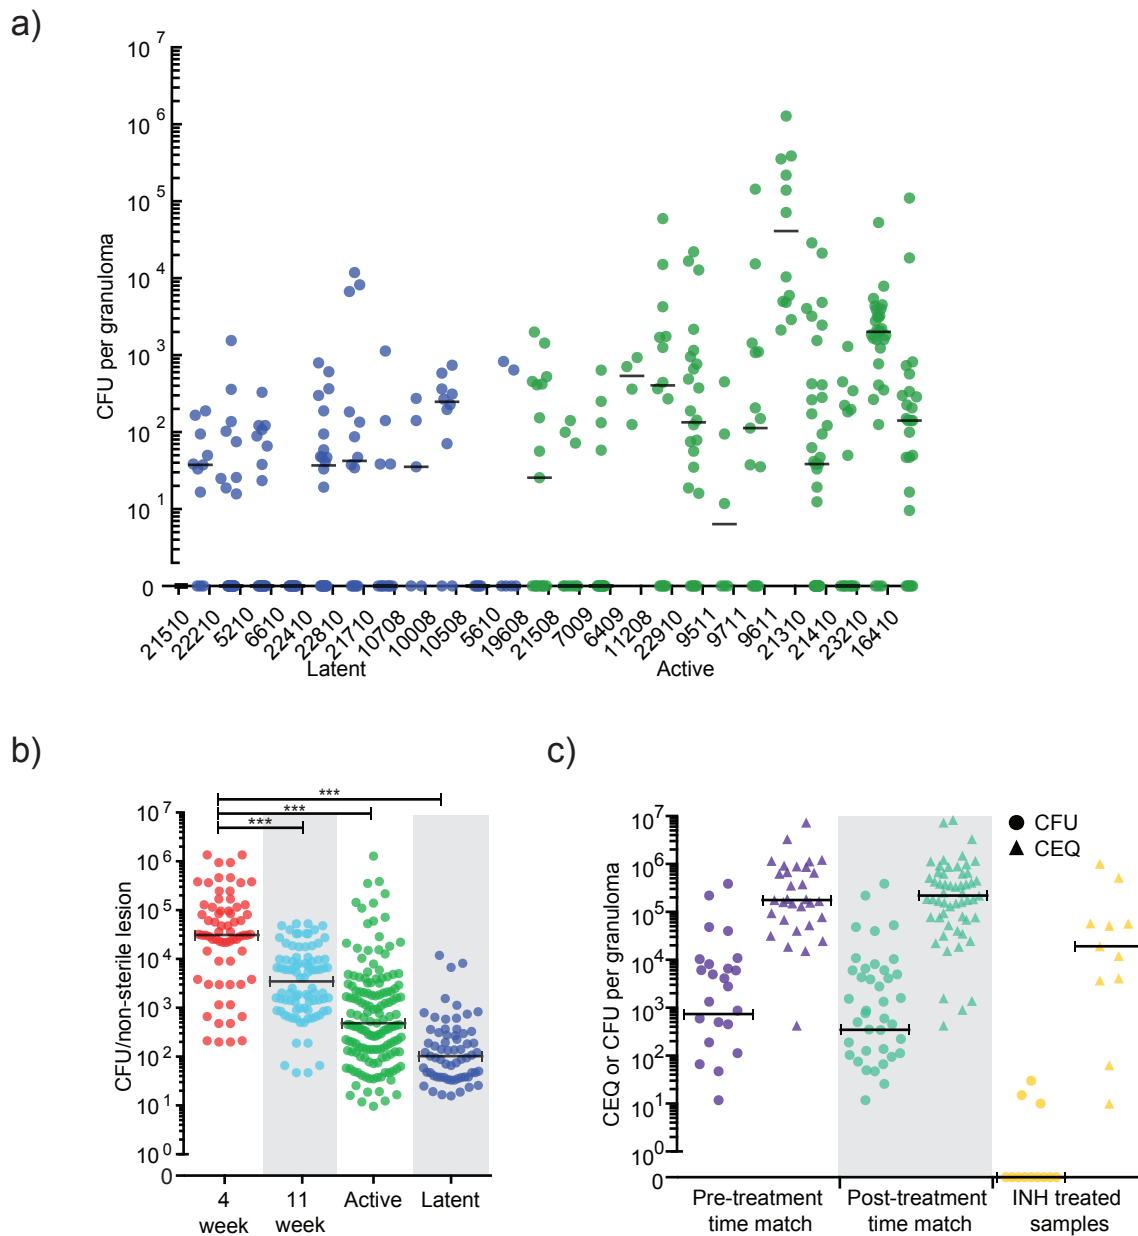

**Supplemental Figure 2 CFU per granuloma in active and latent disease and CEQ controls.** Wide and overlapping bacterial burden in individual lesions from monkeys with active TB and clinically latent infection. At necropsy, individual scan-identified granulomas are plated for bacterial burden. Shown are CFU/granuloma from 13 monkeys with active TB and 11 clinically latent monkeys. Bars represent medians, each circle is a single granuloma from that animal, animal numbers are on the X axis. **(b)** CFU from nonsterile lesions from monkeys at 4 weeks p.i. (n=4) is significantly higher than at 11 weeks (n=3), in active disease (n=13) and in clinically latent infection (n=11). All groups are significantly different from each other by pairwise comparison ( $p < 0.001$ , Mann-Whitney). Circles represent individual lesions. **(c)** Lesions from animals treated with INH (treatment began on average 13 weeks post-infection, yellow) were analyzed for CFU and CEQ to determine if CEQ are stable in the absence of bacterial replication. While the median for CFU is 0, CEQ are significantly higher after two months of treatment, suggesting that CEQ persist in the absence of bacterial replication. Control groups were time matched such that the average time to necropsy was equal to either (1) the time elapsed until the first day of INH treatment (blue) or until the end of INH treatment (green). In both cases, CEQ was ~20 fold lower, suggesting a maximum rate of loss of 4% per day degradation of genomes in lesions treated by drug.

Supplemental Figure 3

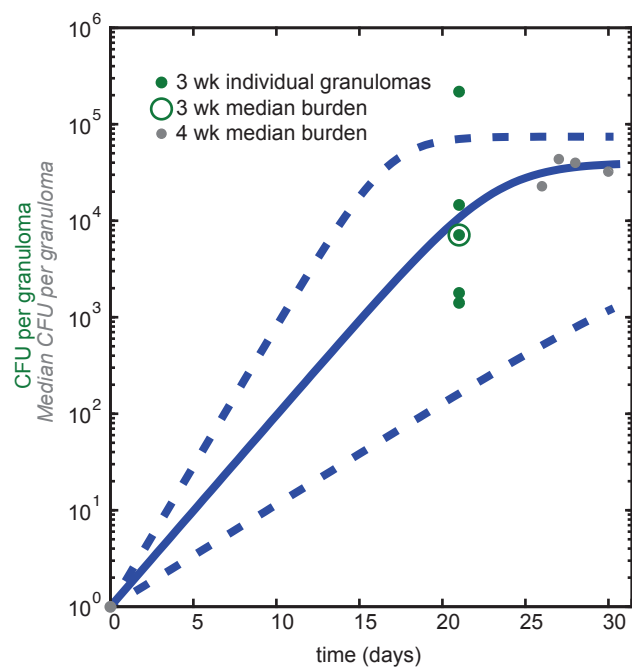

**Supplemental Figure 3 Phase I CFU model with 3 week CFU data.** The ODE based model of bacterial growth between zero and 30 days fitted to median bacterial burden (CFU) per granuloma at each time point (grey symbols) is displayed in blue (dashed lines represent 95% confidence intervals). CFU per granuloma from an additional animal sacrificed at 3 weeks post infection is displayed. Each granuloma is represented by a single green symbol, the median value is circled.

**Supplemental Table 1- Barcoded isolates**

| <b>Strain<sup>1</sup></b> | <b>Gene</b> | <b>Coordinate</b> | <b>WT</b> | <b>Mutant</b> | <b>Gene name or function</b> | <b>codon</b> | <b>mutation</b>          |
|---------------------------|-------------|-------------------|-----------|---------------|------------------------------|--------------|--------------------------|
| <b>E2</b>                 | Rv0591      | 690767            | G         | C             | <i>mce2C</i>                 | ttg          | leu -> phe               |
| <b>I3</b>                 | Rv0668      | 766229            | G         | A             | <i>rpoC</i>                  | ggc          | gly -> ala               |
| <b>G1*</b>                | Rv0876c     | 975906            | T         | C             | unknown                      | ttt          | <i>phe</i> -> <i>phe</i> |
| <b>I4</b>                 | Rv1644      | 1854208           | G         | T             | <i>tsnR</i>                  | gct          | ala->ser                 |
| <b>I5</b>                 | Rv1650      | 1857515           | G         | A             | <i>pheT</i>                  | ggg          | gly->arg                 |
| <b>D1*</b>                | Rv2092c     | 2350697           | G         | T             | <i>helY</i>                  | acg          | <i>thr</i> -> <i>thr</i> |
| <b>I2</b>                 | Rv2187      | 2448250           | G         | A             | <i>fadD15</i>                | cga          | arg->glu                 |
| <b>F3*</b>                | Rv3273      | 3655598           | G         | T             | carbonic anhydrase           | ctg          | <i>leu</i> -> <i>leu</i> |

<sup>1</sup>Each strain was previously whole genome sequenced to identify polymorphisms relative to the parent strain, *M. tuberculosis* Erdman.

\* Strains are marked by synonymous SNP.

**Supplemental Table 2 – Percentage of lesions with *x* strains**

| <b>Strain<br/>count (<i>x</i>)</b> | <b>Granulomas</b> | <b>Clustered<br/>granulomas</b> | <b>2 week<br/>granulomas</b> | <b>3 week<br/>granuloms</b> | <b>Lymph<br/>nodes</b> |
|------------------------------------|-------------------|---------------------------------|------------------------------|-----------------------------|------------------------|
| <b>1</b>                           | 78.9              | 63.6                            | 75.0                         | 83.3                        | 45.5                   |
| <b>2</b>                           | 14.0              | 18.2                            | 63.0                         | 16.7                        | -                      |
| <b>3</b>                           | 35.1              | 4.55                            | 63.0                         | -                           | -                      |
| <b>4</b>                           | 35.1              | 9.09                            | 12.5                         | -                           | -                      |
| <b>5</b>                           | -                 | 4.55                            | -                            | -                           | 27.3                   |
| <b>6</b>                           | -                 | -                               | -                            | -                           | 27.3                   |

**Supplemental Table 3** – Instantaneous and average doubling time in individual lesions

| <b>Time<br/>(days)</b>           | <b>1</b>              | <b>10</b>             | <b>20</b>             | <b>30</b>              | <b>40</b>                  | <b>80<sup>3</sup></b>                     | <b>160<br/>(and after)<sup>3</sup></b>    |
|----------------------------------|-----------------------|-----------------------|-----------------------|------------------------|----------------------------|-------------------------------------------|-------------------------------------------|
| <i>Instantaneous<sup>1</sup></i> | 1.83<br>(2.18 – 1.59) | 1.83<br>(2.18 – 1.59) | 1.87<br>(2.20 – 1.76) | 6.50<br>(2.82 – 41.61) | 483.57<br>(28.50 – 1.33e4) | <i>Inf</i><br>( <i>Inf</i> – <i>Inf</i> ) | <i>Inf</i><br>( <i>Inf</i> – <i>Inf</i> ) |
| <i>Average<sup>2</sup></i>       | 1.83<br>(2.18 – 1.59) | 1.83<br>(2.18 – 1.59) | 1.83<br>(2.19 – 1.60) | 2.17<br>(2.24 – 4.11)  | 28.18<br>(3.99 – 554.59)   | <i>Inf</i><br>( <i>Inf</i> – <i>Inf</i> ) | <i>Inf</i><br>( <i>Inf</i> – <i>Inf</i> ) |

<sup>1</sup> Instantaneous doubling times were estimated using equation (4) based on population size at time(t) (inferred from median CEQ per lesion) and represent the estimated doubling time at time (t). These values do not compensate for potential sources of loss of CEQ over time. In parentheses are the estimated doubling times for the 95% confidence intervals, as seen in figure 4a (lower and upper bound).

<sup>2</sup> Average doubling times based on median CEQ population size at time (t) were estimated using equation (4) and represent the estimated doubling time from time(0) to time(t). These values do not compensate for potential sources of loss of CEQ over time. In parentheses are the estimated doubling times for the 95% confidence intervals, as seen in figure 4a (lower and upper bound, respectively).

<sup>3</sup> *Inf* denotes values where the estimated rate of change in CEQ was effectively zero, giving an infinitely large doubling time.

**Supplemental Table 4 – Animals used in this study**

| <b>Experiment</b>   | <b>Monkey ID</b> | <b>Mtb Strain</b> | <b>Days post infection</b> |
|---------------------|------------------|-------------------|----------------------------|
| 3 week              | 22110            | Erdman            | 20                         |
| 4 week              | 7110             | Erdman            | 30                         |
| 4 week              | 7709             | Erdman            | 28                         |
| 4 week              | 8109             | Erdman            | 27                         |
| 4 week              | 8709             | Erdman            | 26                         |
| 11 week             | 2412             | Erdman            | 83                         |
| 11 week             | 2512             | Erdman            | 85                         |
| 11 week             | 17111            | Erdman            | 84                         |
| Latent              | 5210             | Erdman            | 316                        |
| Latent              | 21510            | Erdman            | 370                        |
| Latent              | 5610             | Erdman            | 209                        |
| Latent              | 22210            | Erdman            | 267                        |
| Latent              | 10508            | Erdman            | 353                        |
| Latent              | 21710            | Erdman            | 370                        |
| Latent              | 10508            | Erdman            | 353                        |
| Latent              | 22810            | Erdman            | 386                        |
| Latent              | 10708            | Erdman            | 446                        |
| Latent              | 10008            | Erdman            | 481                        |
| Latent              | 19808            | Erdman            | 502                        |
| Latent              | 22410            | Erdman            | 580                        |
| Active              | 9611             | Erdman            | 93                         |
| Active              | 6409             | Erdman            | 140                        |
| Active              | 9711             | Erdman            | 175                        |
| Active              | 7009             | Erdman            | 194                        |
| Active              | 9511             | Erdman            | 198                        |
| Active              | 23210            | Erdman            | 211                        |
| Active              | 21410            | Erdman            | 267                        |
| Active              | 19608            | Erdman            | 209                        |
| Active              | 21310            | Erdman            | 230                        |
| Active              | 21410            | Erdman            | 267                        |
| Active              | 21508            | Erdman            | 271                        |
| Active              | 22910            | Erdman            | 288                        |
| Active              | 11208            | Erdman            | 355                        |
| Active              | 16410            | Erdman            | 400                        |
| Active- INH treated | 4008             | Erdman            | 169                        |
| Active- INH treated | 5808             | Erdman            | 168                        |
| Active- INH treated | 8309             | Erdman            | 110                        |
| Active- INH treated | 9009             | Erdman            | 208                        |
| Active- INH treated | 19308            | Erdman            | 129                        |
| 4 week Barcode      | 7010             | Erdman barcoded   | 27                         |
| 4 week Barcode      | 7210             | Erdman barcoded   | 29                         |

**Supplemental Table 5 – Primers used in this study**

| Name                | Target              | Project | Sequence (5' – 3')                                                    |
|---------------------|---------------------|---------|-----------------------------------------------------------------------|
| CBF216              | sigF                | CEQ     | GCG GGT CGG GCT GGT CAA C                                             |
| CBF217              | sigF                | CEQ     | CCT CGC CCA TGA TGG TAG GAA C                                         |
| CBF218 <sup>1</sup> | sigF                | CEQ     | FAM - TCG GAC TTC GTC TCC TTC – IB                                    |
| CBF175 <sup>2</sup> | Rv0591              | Barcode | ACACTCTTTCCCTACACGACGCTCTTCCGATCTCACGGCCCCGACACCCCACTAC               |
| CBF176 <sup>2</sup> | Rv3273              | Barcode | ACACTCTTTCCCTACACGACGCTCTTCCGATCTGCAGGGCAGCGCAACGTG                   |
| CBF177 <sup>2</sup> | Rv0876c             | Barcode | ACACTCTTTCCCTACACGACGCTCTTCCGATCTGTCGTCGGGAGGGTAGTTGGC                |
| CBF178 <sup>2</sup> | Rv0668              | Barcode | ACACTCTTTCCCTACACGACGCTCTTCCGATCTGTCGAGCGTGGTCAAGACCTG<br>G           |
| CBF179 <sup>2</sup> | Rv1644              | Barcode | ACACTCTTTCCCTACACGACGCTCTTCCGATCTCAGTGGACGGCGAGATGGCT                 |
| CBF180 <sup>2</sup> | Rv1650              | Barcode | ACACTCTTTCCCTACACGACGCTCTTCCGATCTGACCTGATCTGCGGCAACCC                 |
| CBF181 <sup>2</sup> | Rv2187              | Barcode | ACACTCTTTCCCTACACGACGCTCTTCCGATCTGTCGCGGCCATGGTGTTCGA                 |
| CBF182 <sup>2</sup> | Rv2092c             | Barcode | ACACTCTTTCCCTACACGACGCTCTTCCGATCTCGCCTGTTGCGGACCCATC                  |
| CBF183 <sup>2</sup> | Rv0591              | Barcode | GTGACTGGAGTTCAGACGTGTGCTCTTCCGATCTCTCAAGCGGTTGGGTGCGTG                |
| CBF184 <sup>2</sup> | Rv3273              | Barcode | GTGACTGGAGTTCAGACGTGTGCTCTTCCGATCTCCAGCTTGACCAGCTGGGC<br>A            |
| CBF185 <sup>2</sup> | Rv0876c             | Barcode | GTGACTGGAGTTCAGACGTGTGCTCTTCCGATCTTCGCCACGGCAGACTCCTC                 |
| CBF186 <sup>2</sup> | Rv0668              | Barcode | GTGACTGGAGTTCAGACGTGTGCTCTTCCGATCTGGTGAAGGTGCGCATGGT<br>CAG           |
| CBF187 <sup>2</sup> | Rv1644              | Barcode | GTGACTGGAGTTCAGACGTGTGCTCTTCCGATCTTGCGTAGGGCCGGACAATC<br>A            |
| CBF188 <sup>2</sup> | Rv1650              | Barcode | GTGACTGGAGTTCAGACGTGTGCTCTTCCGATCTGAGCACCCGCGTGGTCATG                 |
| CBF189 <sup>2</sup> | Rv2187              | Barcode | GTGACTGGAGTTCAGACGTGTGCTCTTCCGATCTCCGCACCCACAGCCAGAAT<br>C            |
| CBF190 <sup>2</sup> | Rv2092c             | Barcode | GTGACTGGAGTTCAGACGTGTGCTCTTCCGATCTGCTGGAGCGGCTGGTGAAG<br>TT           |
| CBF191 <sup>3</sup> | Read 2,<br>Index 1  | Barcode | CAAGCAGAAGACGGCATAACGAGATATCACGGTGACTGGAGTTCAGACGTGTGCT<br>CTTCCGATCT |
| CBF192 <sup>3</sup> | Read 2,<br>Index 2  | Barcode | CAAGCAGAAGACGGCATAACGAGATCGATGTGTGACTGGAGTTCAGACGTGTGCT<br>CTTCCGATCT |
| CBF193 <sup>3</sup> | Read 2,<br>Index 3  | Barcode | CAAGCAGAAGACGGCATAACGAGATTTAGGCGTGACTGGAGTTCAGACGTGTGCT<br>CTTCCGATCT |
| CBF194 <sup>3</sup> | Read 2,<br>Index 4  | Barcode | CAAGCAGAAGACGGCATAACGAGATTGACCAGTGACTGGAGTTCAGACGTGTGCT<br>CTTCCGATCT |
| CBF195 <sup>3</sup> | Read 2,<br>Index 5  | Barcode | CAAGCAGAAGACGGCATAACGAGATACAGTGGTGACTGGAGTTCAGACGTGTGCT<br>CTTCCGATCT |
| CBF196 <sup>3</sup> | Read 2,<br>Index 6  | Barcode | CAAGCAGAAGACGGCATAACGAGATGCCAATGTGACTGGAGTTCAGACGTGTGCT<br>CTTCCGATCT |
| CBF197 <sup>3</sup> | Read 2,<br>Index 7  | Barcode | CAAGCAGAAGACGGCATAACGAGATCAGATCGTGACTGGAGTTCAGACGTGTGCT<br>CTTCCGATCT |
| CBF198 <sup>3</sup> | Read 2,<br>Index 8  | Barcode | CAAGCAGAAGACGGCATAACGAGATACTTGAGTGACTGGAGTTCAGACGTGTGCT<br>CTTCCGATCT |
| CBF199 <sup>3</sup> | Read 2,<br>Index 9  | Barcode | CAAGCAGAAGACGGCATAACGAGATGATCAGGTGACTGGAGTTCAGACGTGTGCT<br>CTTCCGATCT |
| CBF200 <sup>3</sup> | Read 2,<br>Index 10 | Barcode | CAAGCAGAAGACGGCATAACGAGATTAGCTTGTGACTGGAGTTCAGACGTGTGCT<br>CTTCCGATCT |
| CBF201 <sup>3</sup> | Read 2,<br>Index 11 | Barcode | CAAGCAGAAGACGGCATAACGAGATGGCTACGTGACTGGAGTTCAGACGTGTGCT<br>CTTCCGATCT |
| CBF202 <sup>3</sup> | Read 2,<br>Index 12 | Barcode | CAAGCAGAAGACGGCATAACGAGATCTTGATGTGACTGGAGTTCAGACGTGTGCT<br>CTTCCGATCT |
| CBF203 <sup>3</sup> | Read 2,<br>Index 13 | Barcode | CAAGCAGAAGACGGCATAACGAGATAGTCAAGTGACTGGAGTTCAGACGTGTGCT<br>CTTCCGATCT |
| CBF204 <sup>3</sup> | Read 2,<br>Index 14 | Barcode | CAAGCAGAAGACGGCATAACGAGATAGTTCCGTGACTGGAGTTCAGACGTGTGCT<br>CTTCCGATCT |
| CBF205 <sup>3</sup> | Read 2,<br>Index 15 | Barcode | CAAGCAGAAGACGGCATAACGAGATATGTCAGTGACTGGAGTTCAGACGTGTGCT<br>CTTCCGATCT |
| CBF206 <sup>3</sup> | Read 2,<br>Index 16 | Barcode | CAAGCAGAAGACGGCATAACGAGATCCGTCCGTGACTGGAGTTCAGACGTGTGCT<br>CTTCCGATCT |
| (cont.)             | (cont.)             | (cont.) | (cont.)                                                               |

| Name                | Target              | Project | Sequence (5' – 3')                                                                       |
|---------------------|---------------------|---------|------------------------------------------------------------------------------------------|
| CBF207 <sup>3</sup> | Read 2,<br>Index 17 | Barcode | <b>CAAGCAGAAGACGGC</b> <b>CATACGAGAT</b> <i>GTCCGCTG</i> ACTGGAGTTCAGACGTGTGCTCTTCCGATCT |
| CBF208 <sup>3</sup> | Read 2,<br>Index 18 | Barcode | <b>CAAGCAGAAGACGGC</b> <b>CATACGAGAT</b> <i>GTGAAAGT</i> ACTGGAGTTCAGACGTGTGCTCTTCCGATCT |
| CBF209 <sup>3</sup> | Read 2,<br>Index 19 | Barcode | <b>CAAGCAGAAGACGGC</b> <b>CATACGAGAT</b> <i>GTGGCCGT</i> ACTGGAGTTCAGACGTGTGCTCTTCCGATCT |
| CBF210 <sup>3</sup> | Read 2,<br>Index 20 | Barcode | <b>CAAGCAGAAGACGGC</b> <b>CATACGAGAT</b> <i>GTTTCGGT</i> ACTGGAGTTCAGACGTGTGCTCTTCCGATCT |
| CBF211 <sup>3</sup> | Read 2,<br>Index 21 | Barcode | <b>CAAGCAGAAGACGGC</b> <b>CATACGAGAT</b> <i>CGTACGGT</i> ACTGGAGTTCAGACGTGTGCTCTTCCGATCT |
| CBF212 <sup>3</sup> | Read 2,<br>Index 22 | Barcode | <b>CAAGCAGAAGACGGC</b> <b>CATACGAGAT</b> <i>GAGTGGGT</i> ACTGGAGTTCAGACGTGTGCTCTTCCGATCT |
| CBF213 <sup>3</sup> | Read 2,<br>Index 23 | Barcode | <b>CAAGCAGAAGACGGC</b> <b>CATACGAGAT</b> <i>ACTGATGT</i> ACTGGAGTTCAGACGTGTGCTCTTCCGATCT |
| CBF214 <sup>3</sup> | Read 2,<br>Index 24 | Barcode | <b>CAAGCAGAAGACGGC</b> <b>CATACGAGAT</b> <i>ATTCCTGT</i> ACTGGAGTTCAGACGTGTGCTCTTCCGATCT |
| CBF215 <sup>4</sup> | Read 1              | Barcode | <b>AATGATACGGCGACCACCGAGATCT</b> ACACTCTTTCCCTACACGACGCTCTTCCGATCT                       |

<sup>1</sup>Probe structure included a 5' FAM attachment, a 3'Iowa Black Quencher, and an internal Zen Quencher, not noted in the above sequence.

<sup>2</sup> Primer structure included gene sequence homology and Illumina Read 1 or Read 2 primer homology (bold)

<sup>3</sup> Primer structure included Illumina attachment homology (bold), Illumina TruSeq index (italics), and Illumina Read 2 primer homology designed to amplify the primer homology included in primers CBF175-190

<sup>4</sup> Primer structure included Illumina attachment homology (bold) and Illumina Read 1 primer homology designed to amplify the primer homology included in primers CBF175-190
